# Supplementary material
Source: publisher site journal article supplement (https://www.spandidos-publications.com/926/downloadSupplementary)

Figure S1. Native control (medium without cells) and vehicle control (medium with cell) have the same background.

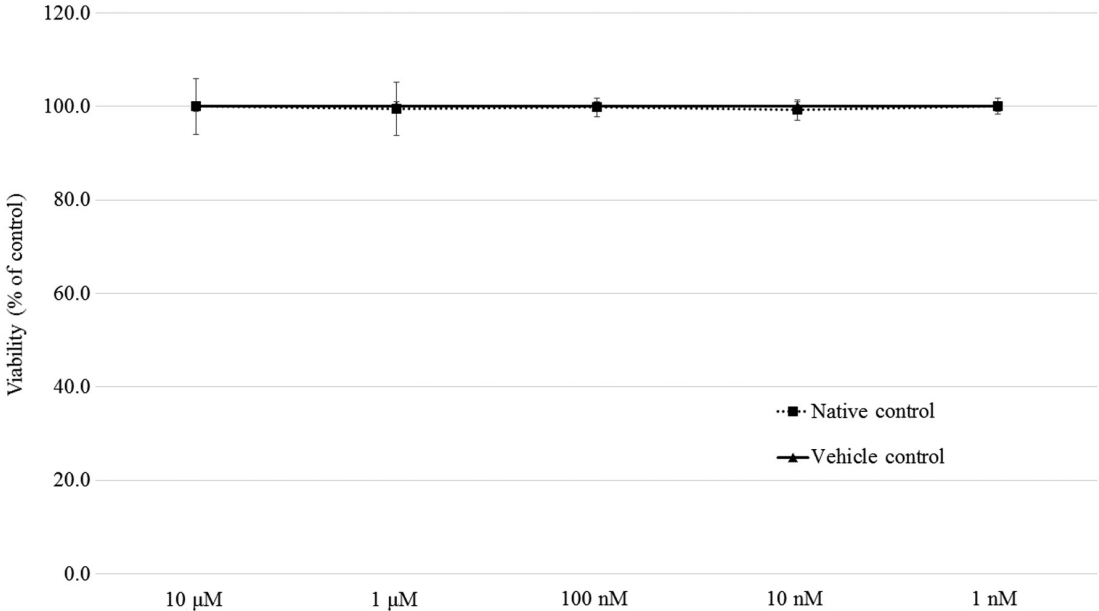

Supplement: Supplementary file 1 [file downloadSupplementary]
